# Supplementary material for: Epigenetic modulation of inflammation and synaptic plasticity promotes resilience against stress in mice
Source: PubMed Central journal article supplement (PMC5797143; doi:10.1038/s41467-017-02794-5), 2018-02-02
Supplement: 41467_2017_2794_MOESM1_ESM.pdf [file 41467_2017_2794_MOESM1_ESM.pdf]

## **Supplementary Information**

**Epigenetic modulation of inflammation and synaptic plasticity  
promotes resilience against stress in mice**

*Wang et. al.*

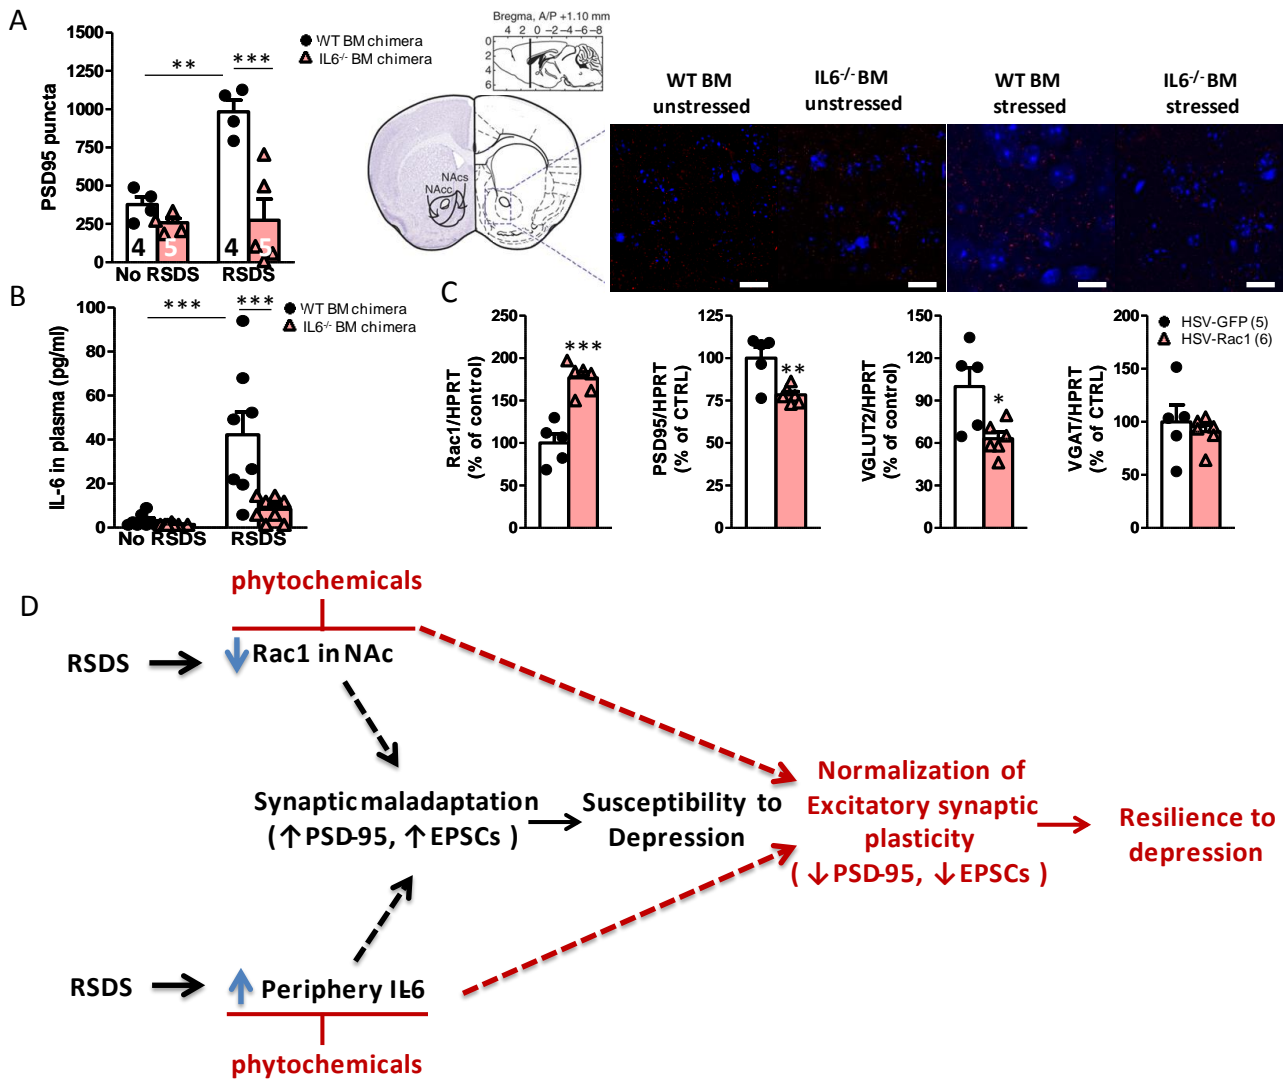

**Supplementary Figure 1. The role of IL-6 and Rac1 in modulating synaptic plasticity.** (A) Quantification of marker of excitatory synapses PSD-95 puncta in NAc from WT and IL-6<sup>-/-</sup> BM chimeric mice with or without RSDS (one-way ANOVA,  $F_{3,17} = 13.94$ ,  $P = 0.0002$ ). Inset: representative schematic of mouse NAc region used for the immunohistological quantification and representative images showing increased frequency of PSD-95 puncta in NAc of stressed WT BM chimeras compared to unstressed WT chimeras and stressed or unstressed IL-6<sup>-/-</sup> BM chimeric mice; scale bar = 10 $\mu$ m. (B) Measurements of IL-6 in the plasma following RSDS (one-way ANOVA,  $F_{3,30} = 12.52$ ,  $P < 0.0001$ ,  $n = 8, 8, 7, 8$  mice) (C) Modulation of synaptic markers on excitatory neurons by Rac1 in MSN-enriched primary cultures. Gene expression of glutamatergic PSD-95, GLUT2 and GABAergic VGAT in MSNs 48 hours following HSV-GFP or HSV-Rac1 infection (unpaired two tailed  $t$ -test). (D) Working hypothesis: RSDS-mediated down regulation of Rac1 in the NAc and upregulation of peripheral IL-6 lead to synaptic maladaptation in the NAc and susceptible phenotype of depression (Black). Select phytochemicals can block RSDS-mediated changes of Rac1 and IL-6, thus normalizing synaptic plasticity and promoting resilience to stress-induced depression (Red). All graphs represent mean  $\pm$  s.e.m., \* $P < 0.05$ , \*\* $P < 0.01$ , \*\*\* $P < 0.001$

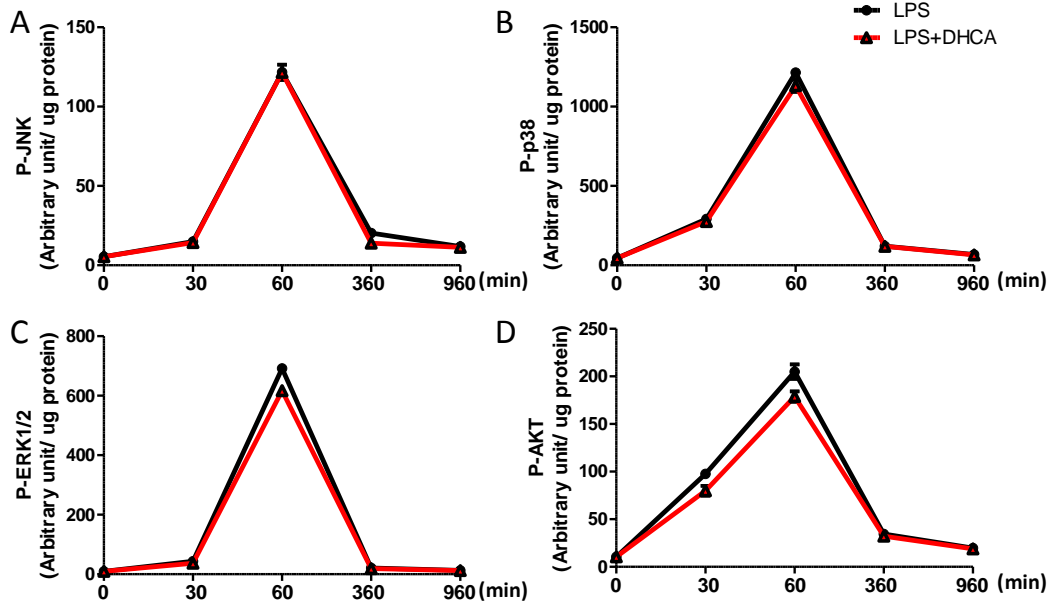

**Supplementary Figure 2. The effect of DHCA on signal transduction pathways in PBMCs following LPS stimulation.** The expression of (A) p-JNK (pT183/pY185), (B) p-p38 (pT180/pY182), (C) p-ERK1/2 (pT185/pY187) and (D) p-AKT (pS473) in PBMCs following 0, 30 minutes, 60 minutes, 360 minutes and 960 minutes of LPS stimulation in the presence or absence of overnight treatment with DHCA (Two-way ANOVA  $P=0.202$   $F_{4,30}=2.05$  for p-JNK;  $P=0.067$   $F_{4,30}=4.98$  for p-p38;  $P=0.010$ ,  $F_{4,30}=14.41$  for p-ERK1/2 and  $P=0.013$ ,  $F_{4,30}=12.05$  for p-AKT,  $n=4$  per culture per condition)

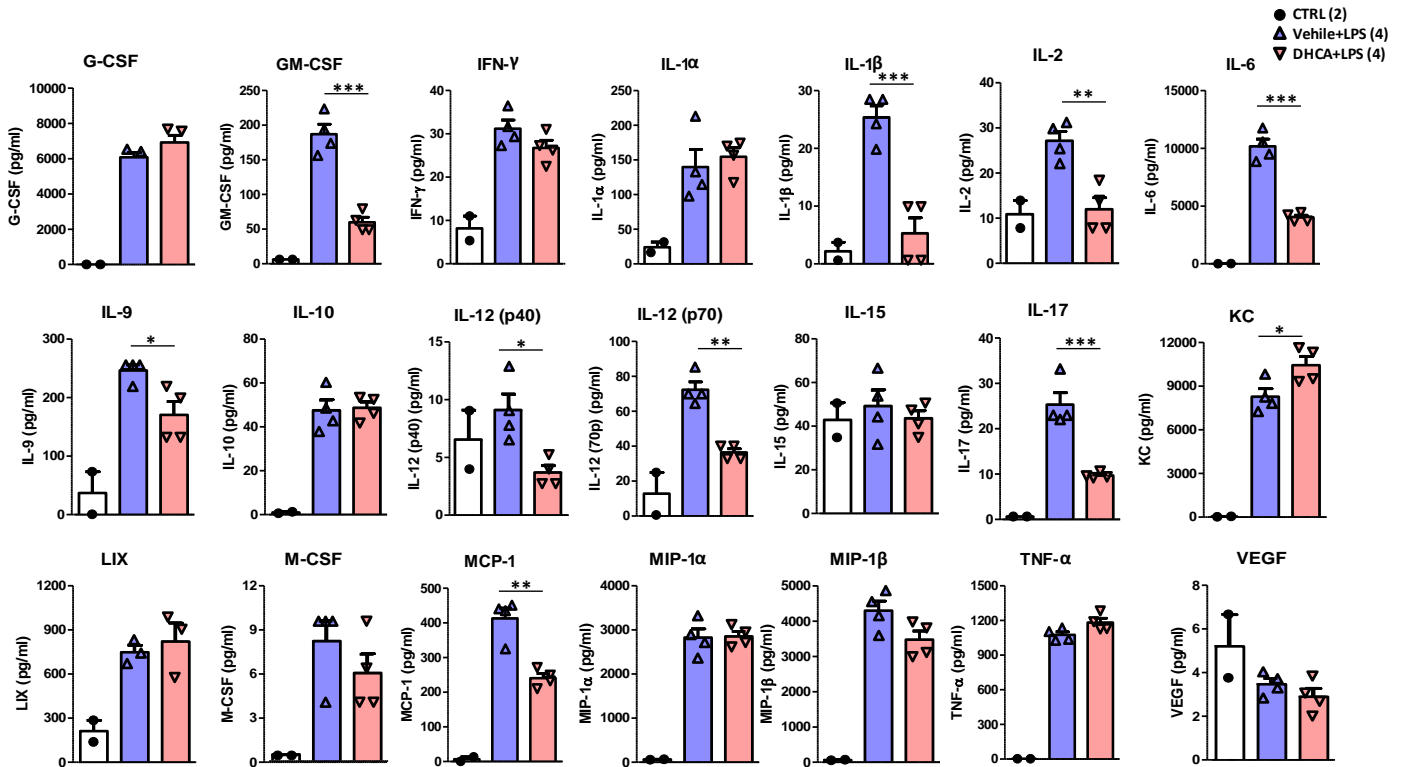

**Supplementary Figure 3. Secretion of cytokines from PBMCs following LPS stimulation.** Mouse PBMCs treated with vehicle or DHCA were stimulated with LPS for 16 hours and cytokines were measured using Mouse Cytokine/chemokine Magnetic Bead Panel Milliplex MAP kit. One-way ANOVA, \* $P < 0.05$ , \*\* $P < 0.01$ , \*\*\* $P < 0.001$ . All graphs represent mean  $\pm$  s.e.m..

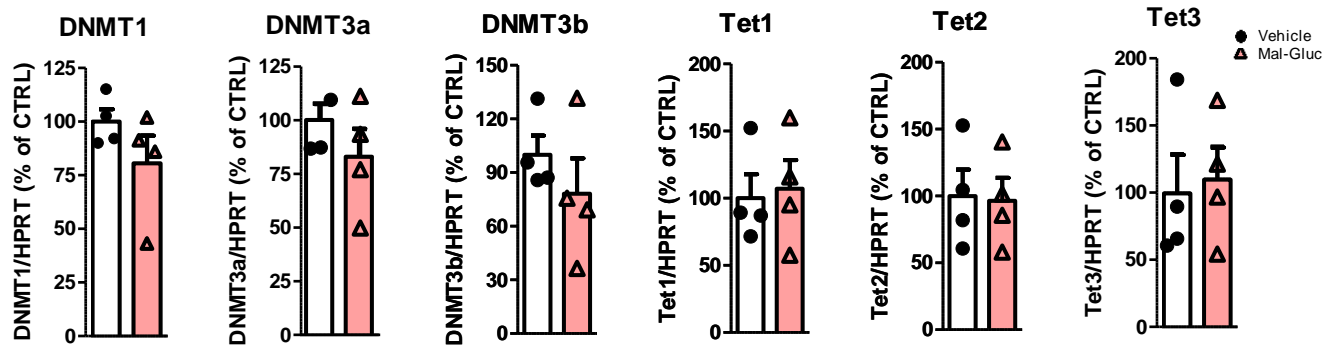

**Supplementary Figure 4. Mal-gluc treatment of MSN-enriched primary neurons has no effect on the expression of genes important for DNA methylation.** The expression of DNMT1, DNMT3a, DNMT3b, Tet1, Tet2 and Tet3 in MSN-enriched primary neurons following 48 hours treatment with Mal-gluc by real-time PCR (two-tailed unpaired *t*-test,  $t_6 = 1.372$ ,  $P = 0.219$  for DNMT1;  $t_6 = 1.135$ ,  $P = 0.300$  for DNMT3a;  $t_6 = 0.969$ ,  $P = 0.370$  for DNMT3b;  $t_6 = 0.256$ ,  $P = 0.806$  for Tet1;  $t_6 = 0.139$ ,  $P = 0.894$  for Tet2;  $t_6 = 0.274$ ,  $P = 0.793$  for Tet3,  $n = 4$  per culture). All graphs represent mean  $\pm$  s.e.m..

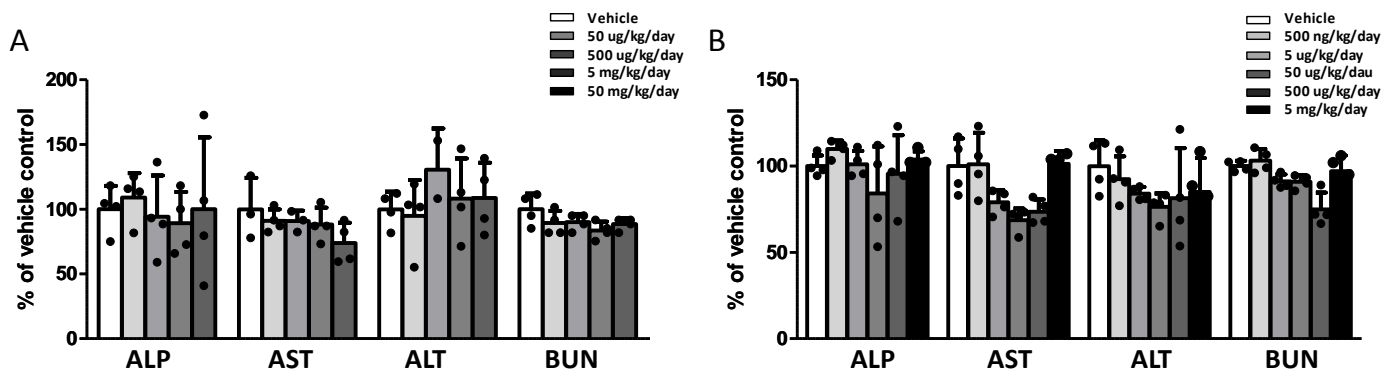

**Supplementary Figure 5. In vivo toxicology indexes in C57BL/6 mice following two-week treatment with various doses of DHCA or Mal-gluc (A)** Blood level of ALP, AST, ALT and BUN following oral administration of DHCA treatment (one-way ANOVA,  $F_{4,19} = 0.204$ ,  $P = 0.932$  for ALP;  $F_{4,19} = 0.981$ ,  $P = 0.447$  for AST;  $F_{4,17} = 1.491$ ,  $P = 0.362$  for ALT;  $F_{4,19} = 2.095$ ,  $P = 0.132$  for BUN;  $n = 4$  animals per dose). **(B)** Blood level of ALP, AST, ALT and BUN following oral administration of Mal-gluc treatment (one-way ANOVA,  $F_{5,23} = 0.63$ ,  $P = 0.673$  for ALP;  $F_{5,23} = 1.828$ ,  $P = 0.158$  for AST;  $F_{5,23} = 0.258$ ,  $P = 0.930$  for ALT;  $F_{5,23} = 2.398$ ,  $P = 0.078$  for BUN,  $n = 4$  animals per dose). All graphs represent mean  $\pm$  s.e.m..

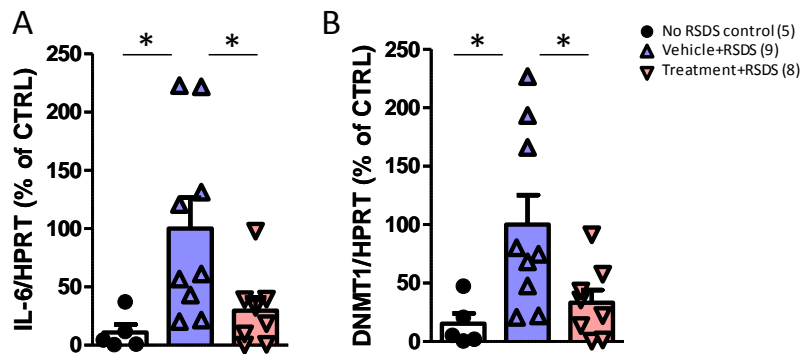

**Supplementary Figure 6. Expression of *IL-6* and *DNMT1* in PBMCs isolated from non-stressed control mice and stressed mice with or without DHCA/Mal-gluc treatment (A) Measurements of *IL-6* mRNA level by real time PCR (one-way ANOVA,  $F_{2,21} = 5.363$ ,  $P = 0.0142$ ). (A) Measurements of *DNMT1* mRNA level by real time PCR (one-way ANOVA,  $F_{2,21} = 5.207$ ,  $P = 0.0157$ ). \* $P < 0.05$ . All graphs represent mean  $\pm$  s.e.m..**

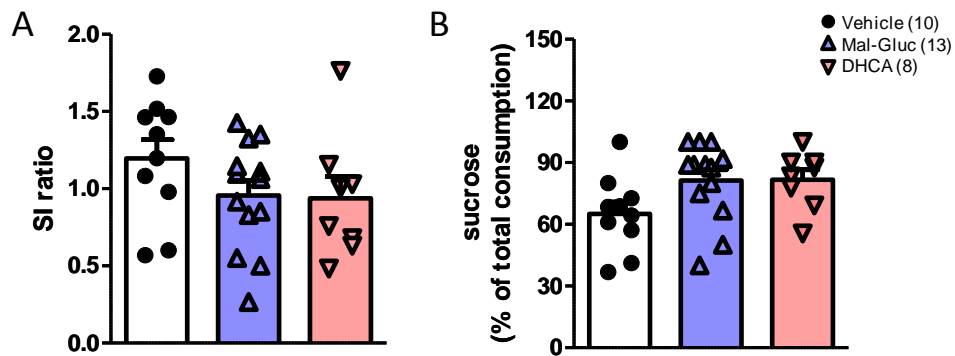

**Supplementary Figure 7. Single target compound treatment does not attenuate depression-like phenotypes following RSDS.** (A) Social avoidance behavioral test in mice treated with either Mal-gluc or DHCA two weeks prior to RSDS and throughout the RSDS (one-way ANOVA,  $F_{2,30} = 1.451$ ,  $P = 0.251$ ). (B) Sucrose preference test following SI test (One-way ANOVA,  $F_{2,30} = 2.961$ ,  $P = 0.068$ ). All graphs represent mean  $\pm$  s.e.m..



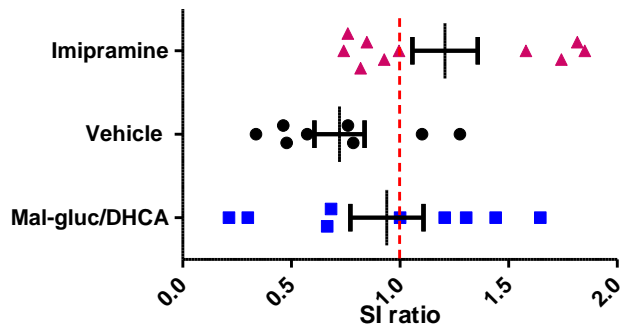

**Supplementary Figure 8. Imipramine and Mal-gluc/DHCA have similar therapeutic efficacy in treating animals with depression-like social avoidance behavior.** Re-testing of social avoidance behavior in susceptible mice following treatment with imipramine, Mal-gluc/DHCA or vehicle (one-way ANOVA,  $F_{2,26} = 2.652$ ,  $P = 0.0911$ ,  $n = 10, 8, 9$  mice). Graphs represents mean  $\pm$  s.e.m..

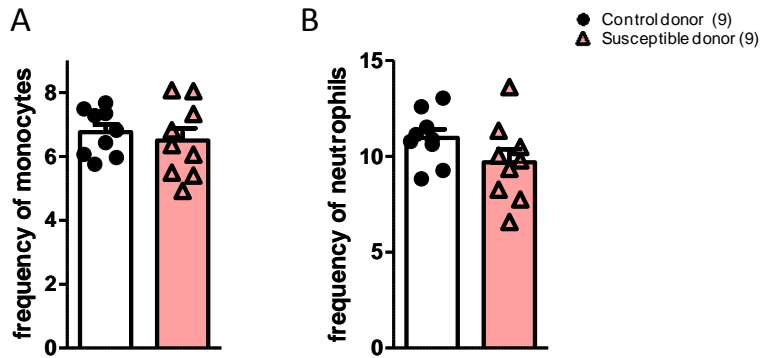

**Supplementary Figure 9. The susceptibility of the donor mice has no significant effect on the regeneration of monocytes or neutrophils prior to sub-threshold defeat.** (A) The frequency of total monocytes and (B) The frequency of total neutrophils in the blood of chimeras either from control donor or from susceptible donor without subthreshold defeat (two-tailed unpaired  $t$ -test,  $t_{16} = 0.570$ ,  $P = 0.576$  for monocytes and  $t_{16} = 1.541$ ,  $P = 0.143$  for neutrophils). All graphs represent mean  $\pm$  s.e.m..

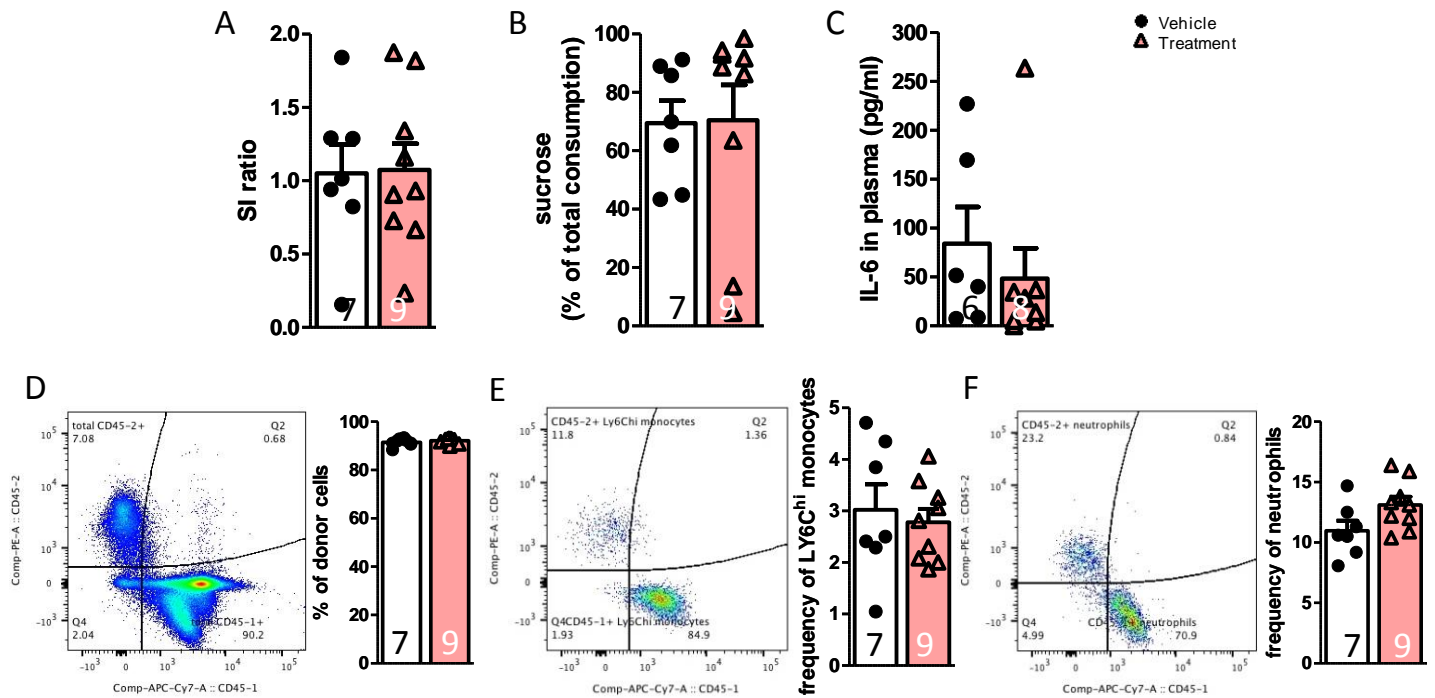

**Supplementary Figure 10. DHCA/Mal-gluc treatment has no significant effect on behavioral and blood cell composition in chimeras with BM reconstructed from naïve mice. (A)** Social avoidance test (two-tailed unpaired *t*-test,  $t_{14} = 4.58$ ,  $P = 0.929$ ). **(B)** Sucrose preference test (two-tailed unpaired *t*-test,  $t_{14} = 0.0138$ ,  $P = 0.989$ ). **(C)** Plasma level of IL-6 24 hours after the sub-threshold defeat (two-tailed unpaired *t*-test,  $t_{14} = 0.736$ ,  $P = 0.476$ ). **(D)** Representative image of flow cytometry gating for donor and recipient viable cells and percentage of cells derived from the donor (two-tailed unpaired *t*-test,  $t_{14} = 1.661$ ,  $P = 0.115$ ). **(E)** Representative image of flow cytometry gating for monocytes and frequency of monocytes of donor origin. Numbers represent percentages of live cells (two-tailed unpaired *t*-test,  $t_{14} = 0.462$ ,  $P = 0.651$ ). **(F)** Representative image of flow cytometry gating for neutrophils and frequency of neutrophils of donor origin. Numbers represent percentages of live cells (two-tailed unpaired *t*-test,  $t_{14} = 2.014$ ,  $P = 0.064$ ). All graphs represent mean  $\pm$  s.e.m..

|                        |    | Biologically Available Phenolic Metabolites | Detection in |       | Compounds Screened |
|------------------------|----|---------------------------------------------|--------------|-------|--------------------|
|                        |    |                                             | Plasma       | Brain |                    |
| Polyphenol Metabolites | 1  | resveratrol                                 | +            | +     | +                  |
|                        | 2  | resveratrol-glucuronide                     | +            | +     | +                  |
|                        | 3  | 3'-OME-catechin-5-glucuronide               | +            | +     | N/A                |
|                        | 4  | 3'-OME-epicatechin-5-glucuronide            | +            | +     | +                  |
|                        | 5  | catechin-5-glucuronide                      | +            | +     | N/A                |
|                        | 6  | delphinidin-glucuronide                     | +            | +     | N/A                |
|                        | 7  | epicatechin-5-glucuronide                   | +            | +     | N/A                |
|                        | 8  | quercetin-glucuroide                        | +            | +     | +                  |
|                        | 9  | OMe-quercetin-glucuronide                   | +            | +     | N/A                |
|                        | 10 | OMe-resveratrol-glucuronide                 | +            | +     | N/A                |
|                        | 11 | cyanidin-3-glucoside                        | +            | +     | +                  |
|                        | 12 | delphinidin-3-glucoside                     | +            | +     | +                  |
|                        | 13 | malvidin-3-glucoside                        | +            | +     | +                  |
|                        | 14 | peonidin-3-glucoside                        | +            | +     | N/A                |
| Phenolic Acids         | 15 | 3-hydroxybenzoic acid                       | -            | +     | +                  |
|                        | 16 | 3-(3'-hydroxyphenyl) propionic acid         | +            | +     | +                  |
|                        | 17 | homovanillic acid                           | +            | -     | +                  |
|                        | 18 | 3',4'-dihydrocaffeic acid                   | +            | -     | +                  |
|                        | 19 | 5-(4'-hydroxyphenyl)valeric acid            | +            | -     | +                  |
|                        | 20 | 3-hydroxyphenylacetic acid                  | +            | -     | +                  |
|                        | 21 | ferulic acid-4'-O-sulfate                   | +            | -     | +                  |

**Supplementary Table 1. Biologically available BDPP phenolic metabolites.** List of 14 polyphenol metabolites and 7 phenolic acids found accumulated in plasma and/or brain following oral administration of BDPP or BDPP components. Fourteen of the compounds were available, either through commercial sources or our own biosynthesis, for our in vitro investigations. + denotes phenolic metabolites screened in Figs. 2A, 2B, 2C and 2D; N/A denotes phenolic metabolites that are not available for our investigation.

| Gene   | Forward                | Reverse                 |
|--------|------------------------|-------------------------|
| Rac1   | GGTAGGTGATGGGAGTCAGC   | CTGAAGTGCGACACCACTGT    |
| PSD95  | CGGGAGAAAATGGAGAAGGAC  | GCATTGGCTGAGACATCAAG    |
| VGLUT2 | GCTCACCTCTACCCTCAATATG | CCACTTGCTCCATATCCCATG   |
| VGAT   | ACGACAAACCCAAGATCACG   | AAGATGATGAGGAACAACCCC   |
| HPRT   | CCCCAAAATGGTTAAGGTTGC  | AACAAAGTCTGGCCTGTATCC   |
| DNMT1  | CTCAGGGACCATATCTGCAAG  | GGTGTACTGTAGCTTATGGGC   |
| DNMT3a | GGAAAGATCATGTACGTCGGG  | GCCAGTACCCTCATAAAGTCC   |
| DNMT3b | GTACCCCATCAGTTGACTTGAG | TTGATCTTTCCCACACGAG     |
| TET1   | GAGCCTGTTCCCTCGATGTGG  | CAAACCCACCTGAGGCTGTT    |
| TET2   | TGTTGTTGTCAGGGTGAGAATC | TCTTGCTTCTGGCAAAC TTACA |
| TET3   | CCGGATTGAGAAGGTCATCTAC | AAGATAACAATCACGGCGTTC   |
| HDAC2  | GGGACAGGCTTGGTTGTTTC   | GAGCATCAGCAATGGCAAGT    |
| HDAC3  | TGTCTCAATGTGCCCTTACG   | CCTAATCGATCACAGCCCAG    |
| HDAC4  | CAATCCCACAGTCTCCGTGT   | CAGCACCCCACTAAGGTTCA    |
| HDAC5  | TTCAACTCCGTAGCCATCAC   | GGATCGTTGTAGAATGCTTGC   |
| HDAC7  | GGTGGACCCCCCTTTCAGAAG  | TGGGTAGCCAGGAGTCTGGA    |
| HDAC9  | GCGAGACACAGATGCTCAGAC  | TGGGTTTTCTTCCATTGCT     |

**Supplementary Table 2. Mouse qPCR primer sets used in the study.**
